# Supplementary material for: Synthesis and Electrochemical Performance of the Orthorhombic V2O5·nH2O Nanorods as Cathodes for Aqueous Zinc Batteries
Source: MDPI journal article supplement (doi:10.3390/nano12152530), 2022-07-23
Supplement: s1 [file s1]

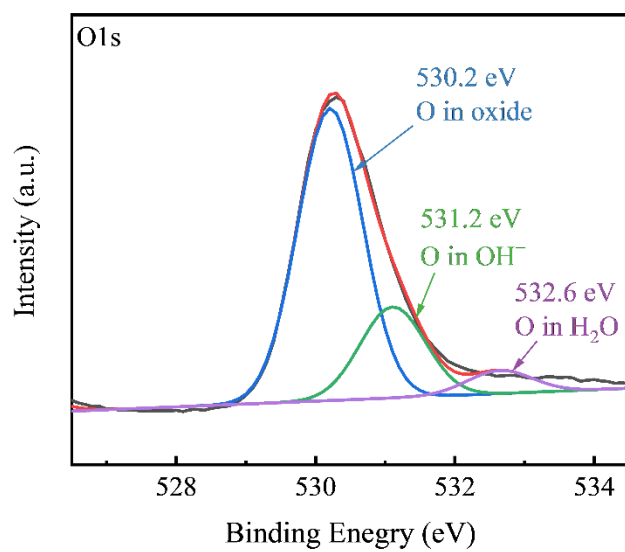

**Figure S1.** O 1s XPS spectrum in  $V_2O_5 \cdot nH_2O$  nanorods.

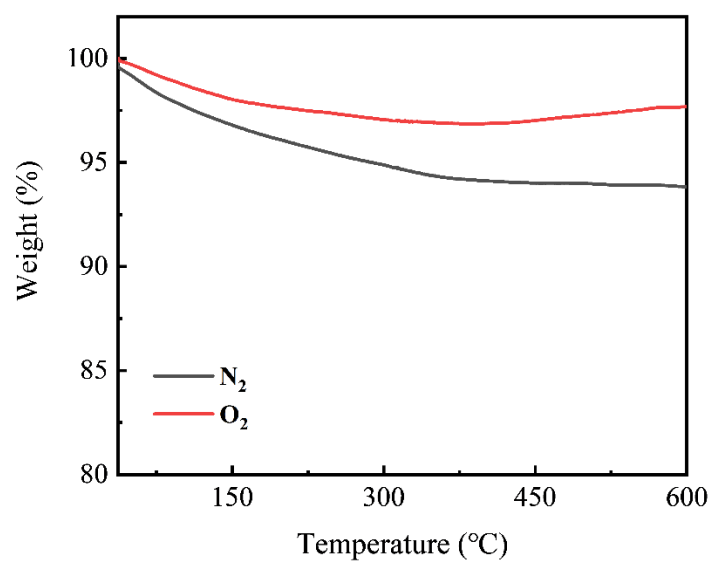

**Figure S2.** TG curves of the  $V_2O_5 \cdot nH_2O$  nanorods under  $O_2$  and  $N_2$  atmospheres.

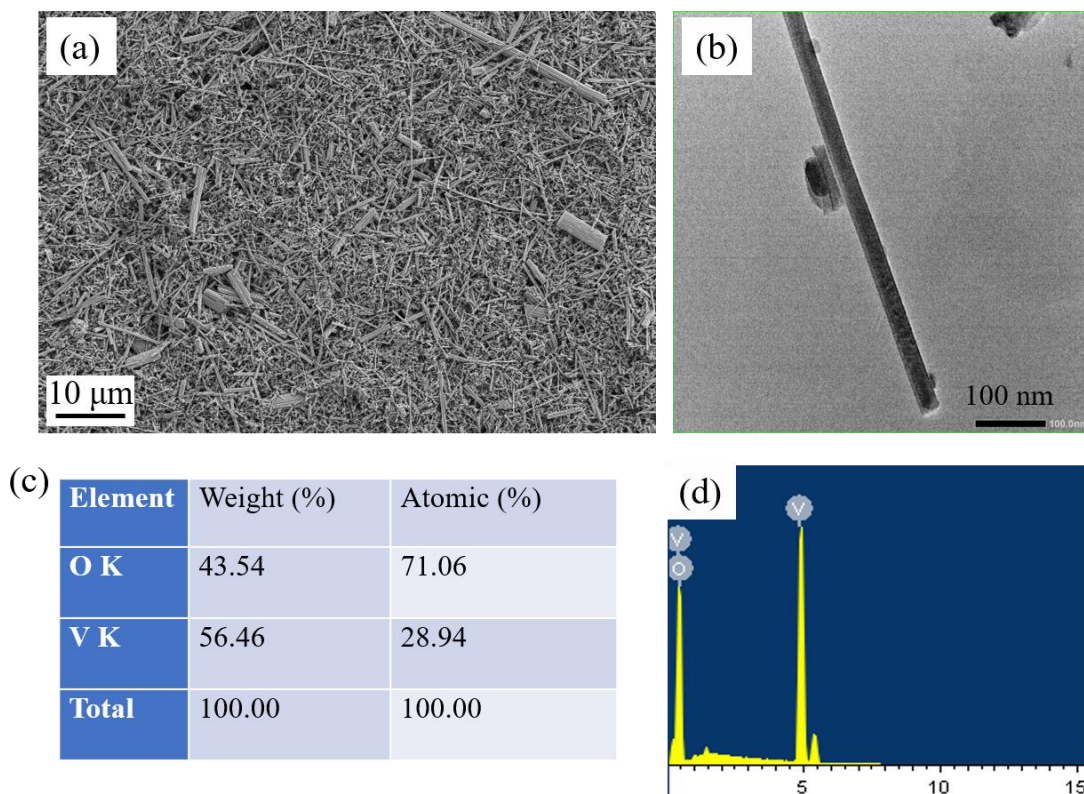

**Figure S3.** (a) SEM, (b) TEM images of  $\text{V}_2\text{O}_5 \cdot n\text{H}_2\text{O}$  nanorods at low magnification and (c,d) elemental results from EDX measurement.

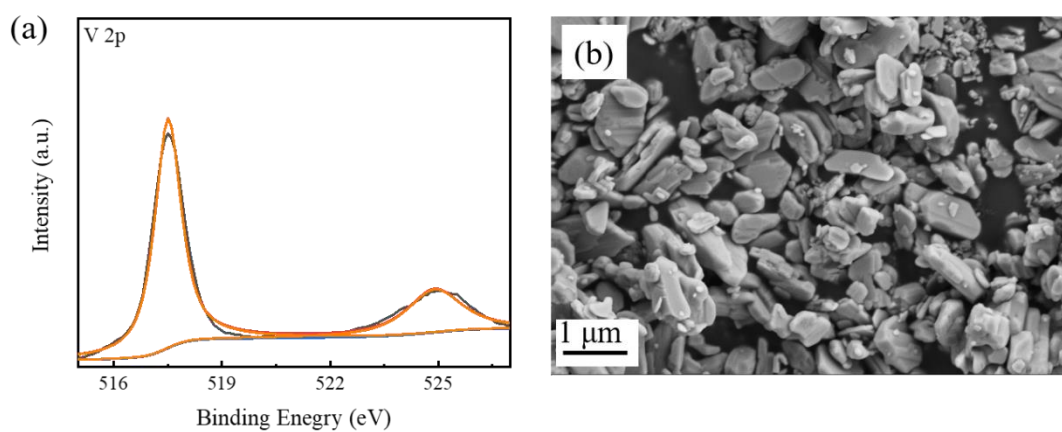

**Figure S4.** (a) V 2p XPS spectrum and (b) SEM image of commercial  $\text{V}_2\text{O}_5$  powders.

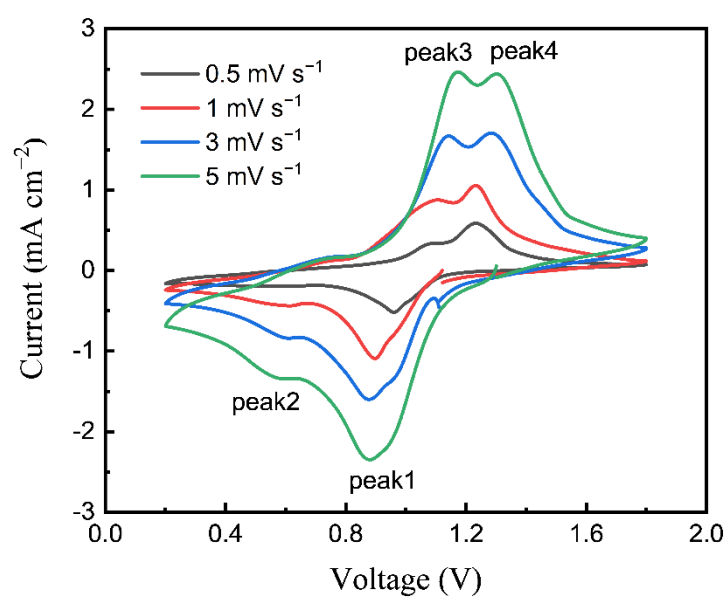

**Figure S5.** CV curves of  $\text{V}_2\text{O}_5 \cdot n\text{H}_2\text{O}$  nanorods at different scan rates.

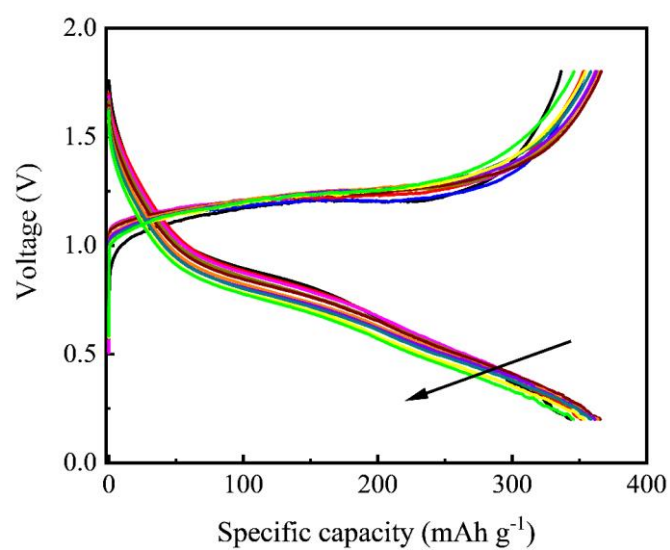

**Figure S6.** Selected discharge-charge patterns for  $\text{V}_2\text{O}_5 \cdot n\text{H}_2\text{O}$  nanorods cathode at  $1.0 \text{ A g}^{-1}$  at 10th, 20th, 30th, 40th, 50th, 60th, 70th, 80th, 90th, 100th cycles.

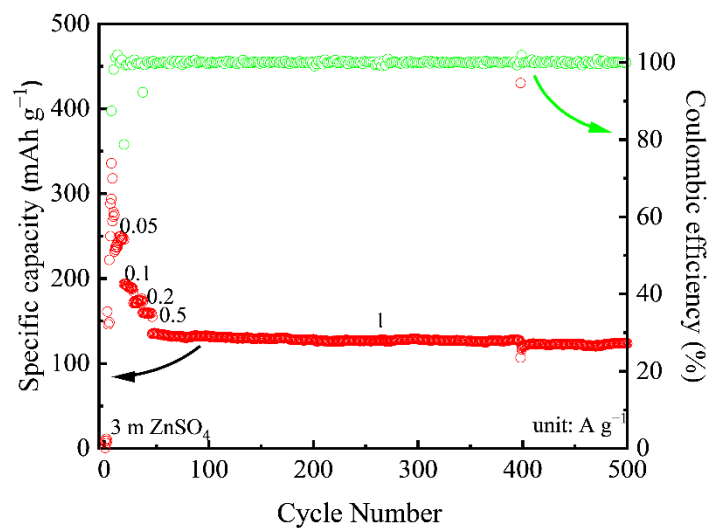

**Figure S7.** Cycling performance and corresponding Coulombic efficiencies of the commercial  $\text{V}_2\text{O}_5$  powders at  $1.0 \text{ A g}^{-1}$  over 500 cycles.

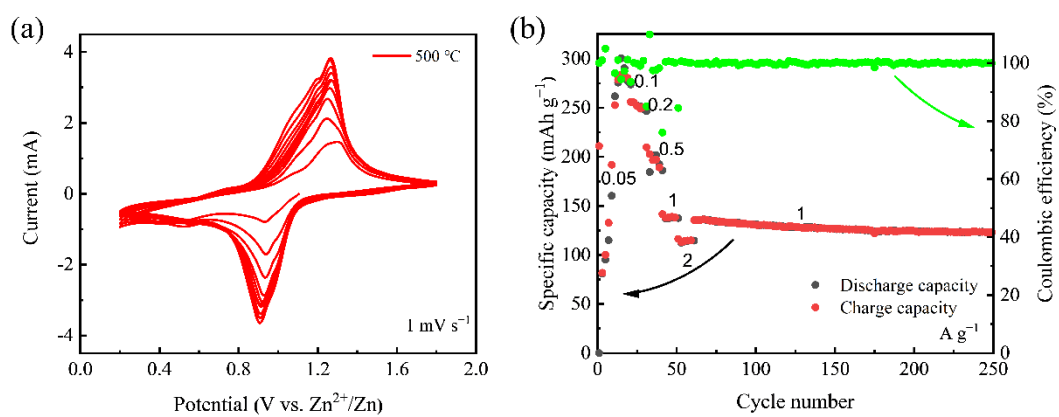

**Figure S8.** CV curves (a) and cycling performance with Coulombic efficiencies (b) of  $\text{V}_2\text{O}_5$  nanorods annealed at  $500^\circ\text{C}$ .

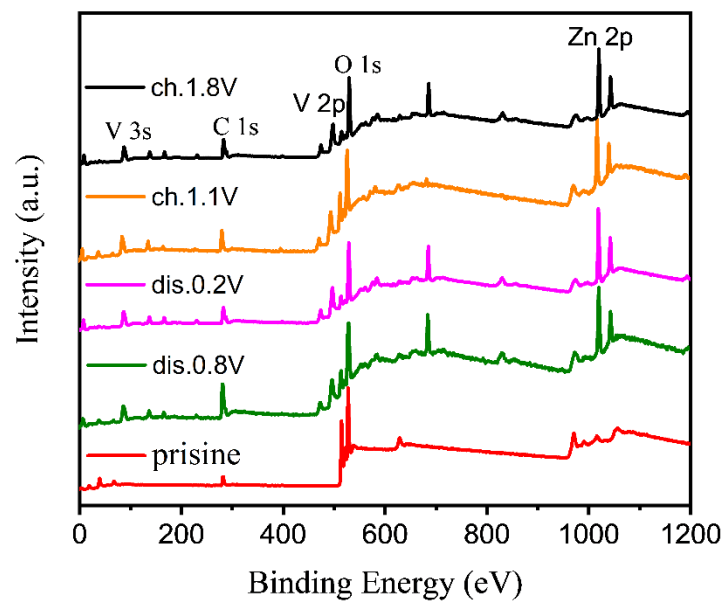

**Figure S9.** The full XPS spectra of the  $\text{V}_2\text{O}_5 \cdot n\text{H}_2\text{O}$  nanorods at different charge–discharge states.

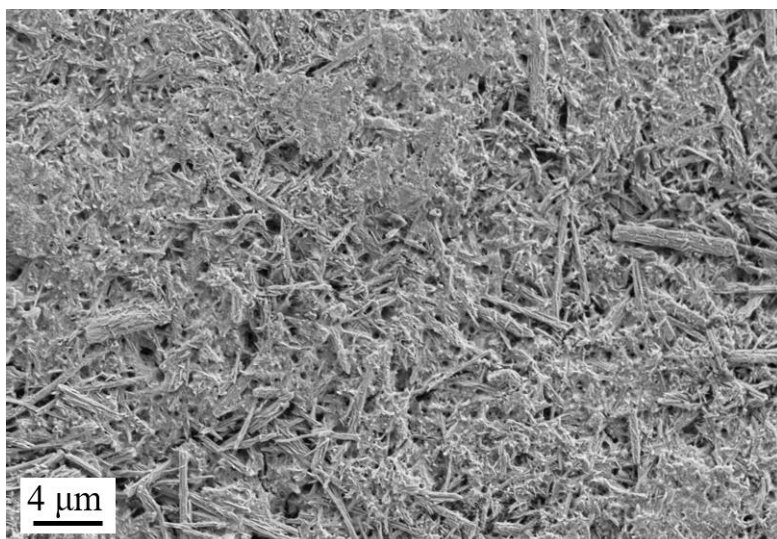

**Figure S10.** SEM image of  $\text{V}_2\text{O}_5 \cdot n\text{H}_2\text{O}$  nanorods after 200 cycles at low magnification.

**Table S1.** Electrochemical performance of the reported orthorhombic V<sub>2</sub>O<sub>5</sub> materials in aqueous Zn batteries.

| Materials                                                 | Capacity                                          | Cycling                                                               | Electrolyte/Zn                                                     | Ref.      |
|-----------------------------------------------------------|---------------------------------------------------|-----------------------------------------------------------------------|--------------------------------------------------------------------|-----------|
| V <sub>2</sub> O <sub>5</sub> nanoparticles               | 224 mAh g <sup>-1</sup> at 0.1 A g <sup>-1</sup>  | 120 mAh g <sup>-1</sup> at 1 A g <sup>-1</sup><br>after 400 cycles    | 3M ZnSO <sub>4</sub> /<br>Zn foil                                  | [24]      |
| Ball-milled commercial V <sub>2</sub> O <sub>5</sub>      | 453 mAh g <sup>-1</sup> at 0.1 A g <sup>-1</sup>  | 372 mAh g <sup>-1</sup> at 5 A g <sup>-1</sup><br>after 4000 cycles   | 3 M Zn(CF <sub>3</sub> SO <sub>3</sub> ) <sub>2</sub> /<br>Zn foil | [23]      |
| V <sub>2</sub> O <sub>5</sub> hollow spheres              | 360 mAh g <sup>-1</sup> at 0.1 A g <sup>-1</sup>  | 150 mAh g <sup>-1</sup> at 0.5 A g <sup>-1</sup><br>after 265 cycles  | saturated ZnSO <sub>4</sub> /<br>Zn foil                           | [35]      |
| V <sub>2</sub> O <sub>5</sub> @CNTs                       | 300 mAh g <sup>-1</sup> at 0.1 A g <sup>-1</sup>  | 152 mAh g <sup>-1</sup> at 5 A g <sup>-1</sup><br>after 6000 cycles   | saturated ZnSO <sub>4</sub> /<br>Zn foil                           | [S1]      |
| Porous V <sub>2</sub> O <sub>5</sub> nanofibers           | 265 mAh g <sup>-1</sup> at 0.02 A g <sup>-1</sup> | 166 mAh g <sup>-1</sup> at 0.59 A g <sup>-1</sup><br>after 500 cycles | 3 M Zn(CF <sub>3</sub> SO <sub>3</sub> ) <sub>2</sub> /<br>Zn foil | [S2]      |
| V <sub>2</sub> O <sub>5</sub> nano paper                  | 375 mAh g <sup>-1</sup> at 0.5 A g <sup>-1</sup>  | 335 mAh g <sup>-1</sup> at 1.0 A g <sup>-1</sup><br>after 100 cycles  | 2 M ZnSO <sub>4</sub> /<br>Zn metal pellet                         | [36]      |
| V <sub>2</sub> O <sub>5</sub> nanospheres                 | 262 mAh g <sup>-1</sup> at 1.0 A g <sup>-1</sup>  | 110 mAh g <sup>-1</sup> at 1.0 A g <sup>-1</sup><br>after 80 cycles   | 2 M ZnSO <sub>4</sub> /<br>Zn metal plate                          | [37]      |
| V <sub>2</sub> O <sub>5</sub> ·nH <sub>2</sub> O nanorods | 507 mAh g <sup>-1</sup> at 0.05 A g <sup>-1</sup> | 230 mAh g <sup>-1</sup> at 1.0 A g <sup>-1</sup><br>after 500 cycles  | 3 m ZnSO <sub>4</sub> /<br>Zn foil                                 | This work |
| V <sub>2</sub> O <sub>5</sub> ·nH <sub>2</sub> O nanorods | 330 mAh g <sup>-1</sup> at 1.0 A g <sup>-1</sup>  | 156 mAh g <sup>-1</sup> at 1.0 A g <sup>-1</sup><br>after 100 cycles  | 3 m ZnSO <sub>4</sub> /<br>Zn powder                               | This work |

### Supplementary References

- Chen, H.; Qin, H.; Chen, L.; Wu, J.; Yang, Z. V<sub>2</sub>O<sub>5</sub>@CNTs as cathode of aqueous zinc ion battery with high rate and high stability. *J. Alloys Compd.* **2020**, *842*, 155912. <https://doi.org/10.1016/j.jallcom.2020.155912>.
- Chen, X.; Wang, L.; Li, H.; Cheng, F.; Chen, J. Porous V<sub>2</sub>O<sub>5</sub> nanofibers as cathode materials for rechargeable aqueous zinc-ion batteries. *J. Energy Chem.* **2019**, *38*, 20–25. <https://doi.org/10.1016/j.jechem.2018.12.023>.
